# Supplementary material for: Combined Effects of Cytokinin and UV-C Light on Phenolic Pattern in Ceratonia siliqua Shoot Cultures
Source: MDPI journal article supplement (doi:10.3390/agronomy13030621), 2023-02-22
Supplement: s1 [file s1]

Supplementary Materials

# Combined Effects of Cytokinin and UV-C Light on Phenolic Pattern in *Ceratonia siliqua* Shoot Cultures

Antonio Costa-Pérez, María A. Ferrer \* and Antonio A. Calderón

Department of Agronomic Engineering, Universidad Politécnica de Cartagena, Paseo Alfonso XIII 48, 30203 Cartagena, Spain; costa\_maz@hotmail.com (A.C.-P.); antonio.calderon@upct.es (A.A.C.)

\* Correspondence: [mangeles.ferrer@upct.es](mailto:mangeles.ferrer@upct.es)

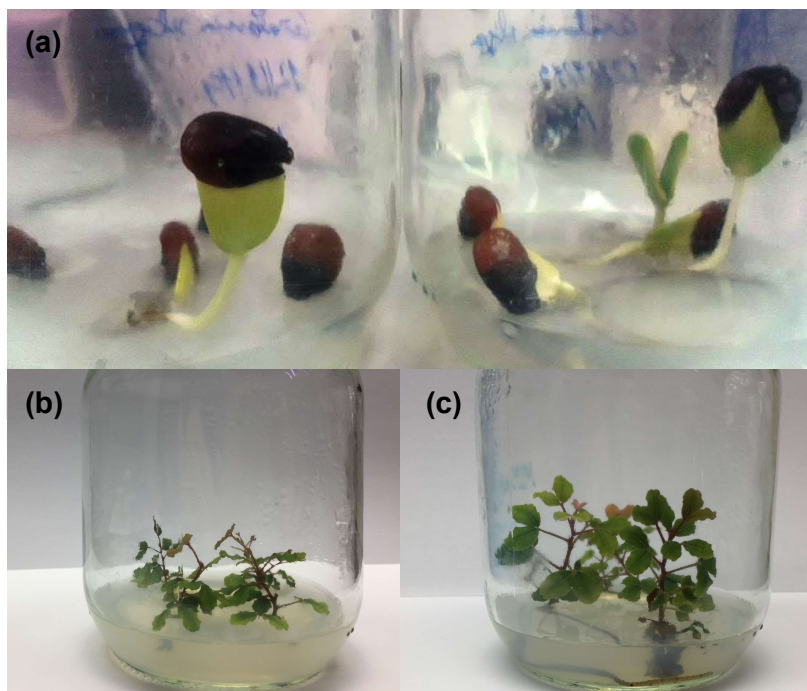

**Figure S1.** Representative photos of the different steps carried out during the carob micropropagation process. (a) Germination of carob seeds; (b) Carob shoots after 6 weeks of growth; (c) Carob shoots after X weeks of growth.

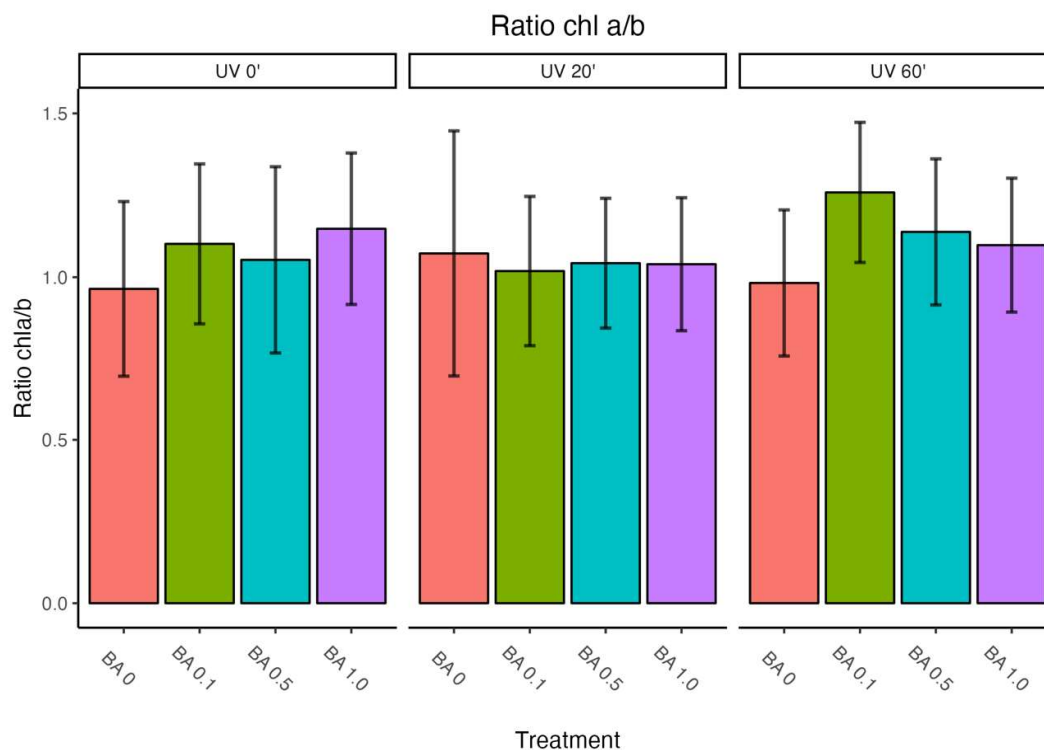

**Figure S2.** Effect of different concentrations of BA and UV-C treatments on the chlorophyll *a/b* ratio in 6-week-old carob shoots.

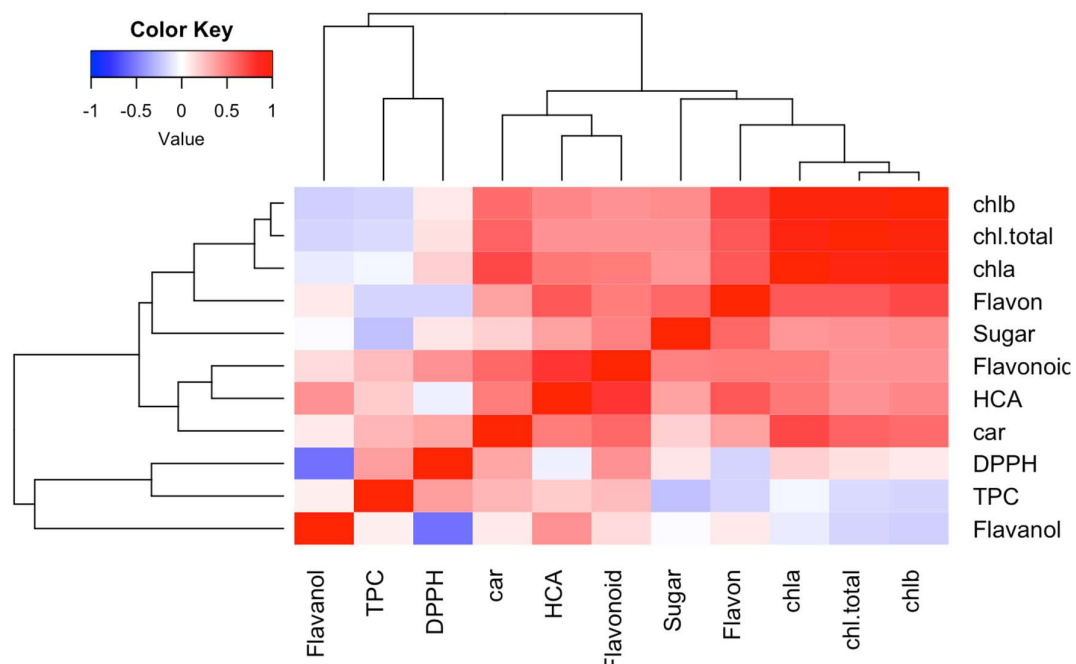

**Figure S3.** Pearson correlation coefficients and hierarchical clustering using the Euclidean distance between the different biochemical parameters measured in this study.
