# Supplementary material for: Combined Effects of Cytokinin and UV-C Light on Phenolic Pattern in Ceratonia siliqua Shoot Cultures
Source: MDPI journal article supplement (doi:10.3390/agronomy13030621), 2023-02-22
Supplement: s1 [file s1]

Archive with 1 entries (1 files):
- agronomy-2201842-supplementary.pdf
